# Supplementary material for: The ULK1-FBXW5-SEC23B nexus controls autophagy
Source: eLife. 2018 Dec 31;7:e42253. doi: 10.7554/eLife.42253 (PMC6351106; doi:10.7554/eLife.42253)
Supplement: Figure 1—source data 1. [file elife-42253-fig1-data1.xlsx]

## Sheet: Fig1D
Name	Signal#1	Signal#2	Signal#3		Name	Signal#1	Signal#2	Signal#3
siNT	53800	54700	54900		siNT(0h)	100	100	100
siNT	13300	15300	14700		siNT(3h)	24.7212	27.9707	26.776
siNT	5500	7800	4300		siNT(6h)	10.223	14.2596	7.83242
siW5#2	69100	71100	68100		siW5#2(0h)	100	100	100
siW5#2	36000	34000	37000		siW5#2(3h)	52.0984	47.82	54.3319
siW5#2	30000	25000	27000		siW5#2(6h)	43.4153	35.1617	39.6476
siW5#3	119000	109000	101000		siW5#3(0h)	100	100	100
siW5#3	69500	64000	61500		siW5#3(3h)	58.4034	58.7156	60.8911
siW5#3	63000	79000	60000		siW5#3(6h)	52.9412	72.4771	59.4059
