# Supplementary material for: The ULK1-FBXW5-SEC23B nexus controls autophagy
Source: eLife. 2018 Dec 31;7:e42253. doi: 10.7554/eLife.42253 (PMC6351106; doi:10.7554/eLife.42253)
Supplement: Figure 2—figure supplement 1—source data 1. [file elife-42253-fig2-figsupp1-data1.xlsx]

## Sheet: Fig2-figure supplement 1F
UT	EBSS
0.389	0.449
0.336	0.518
0.613	0.722
0.45	0.586
0.194	0.565
0.261	0.682
0.441	0.403
0.134	0.339
0.4	0.339
0.457	0.591
