# Supplementary material for: The ULK1-FBXW5-SEC23B nexus controls autophagy
Source: eLife. 2018 Dec 31;7:e42253. doi: 10.7554/eLife.42253 (PMC6351106; doi:10.7554/eLife.42253)
Supplement: Figure 3—source data 1. [file elife-42253-fig3-data1.xlsx]

## Sheet: Fig3E
	siNT	siULK2
1	1	0.38
2	1	0.32
3	1	0.3
