# Supplementary material for: The ULK1-FBXW5-SEC23B nexus controls autophagy
Source: eLife. 2018 Dec 31;7:e42253. doi: 10.7554/eLife.42253 (PMC6351106; doi:10.7554/eLife.42253)
Supplement: Figure 4—figure supplement 1—source data 1. [file elife-42253-fig4-figsupp1-data1.xlsx]

## Sheet: Fig4-figure supplement 1A
	cell	green area	green/cell
siNT-14_R3D_594_523_435.tif (blue)	13	186	14.3077
siNT-13_R3D_594_523_435.tif (blue)	8	239	29.875
siNT-12_R3D_594_523_435.tif (blue)	11	474	43.0909
siNT-11_R3D_594_523_435.tif (blue)	9	65	7.22222
siNT-20_R3D_594_523_435.tif (blue)	13	330	25.3846
siNT-19_R3D_594_523_435.tif (blue)	8	66	8.25
siNT-18_R3D_594_523_435.tif (blue)	8	46	5.75
siNT-17_R3D_594_523_435.tif (blue)	11	176	16
siNT-16_R3D_594_523_435.tif (blue)	12	269	22.4167
siNT-15_R3D_594_523_435.tif (blue)	12	184	15.3333
siNT-baf-6_R3D_594_523_435.tif (blue)	14	1977	141.214
siNT-baf-5_R3D_594_523_435.tif (blue)	9	1463	162.556
siNT-baf-4_R3D_594_523_435.tif (blue)	11	991	90.0909
siNT-baf-3_R3D_594_523_435.tif (blue)	15	1366	91.0667
siNT-baf-2_R3D_594_523_435.tif (blue)	8	1015	126.875
siNT-baf-1_R3D_594_523_435.tif (blue)	11	1235	112.273
siNT-baf-10_R3D_594_523_435.tif (blue)	12	1039	86.5833
siNT-baf-9_R3D_594_523_435.tif (blue)	10	1584	158.4
siNT-baf-8_R3D_594_523_435.tif (blue)	11	712	64.7273
siNT-baf-7_R3D_594_523_435.tif (blue)	9	1317	146.333
siW5-14_R3D_594_523_435.tif (blue)	10	410	58.5714
siW5-13_R3D_594_523_435.tif (blue)	9	100	14.2857
siW5-12_R3D_594_523_435.tif (blue)	11	922	83.8182
siW5-11_R3D_594_523_435.tif (blue)	10	882	88.2
siW5-20_R3D_594_523_435.tif (blue)	10	180	30
siW5-19_R3D_594_523_435.tif (blue)	12	351	70.2
siW5-18_R3D_594_523_435.tif (blue)	13	718	79.7778
siW5-17_R3D_594_523_435.tif (blue)	9	346	43.25
siW5-16_R3D_594_523_435.tif (blue)	12	599	74.875
siW5-15_R3D_594_523_435.tif (blue)	11	198	18
siW5-baf-7_R3D_594_523_435.tif (blue)	12	3471	299.5
siW5-baf-6_R3D_594_523_435.tif (blue)	10	2645	382
siW5-baf-5_R3D_594_523_435.tif (blue)	8	2181	727
siW5-baf-4_R3D_594_523_435.tif (blue)	7	1992	672
siW5-baf-3_R3D_594_523_435.tif (blue)	9	3198	456.857
siW5-baf-2_R3D_594_523_435.tif (blue)	10	1161	232.2
siW5-baf-1_R3D_594_523_435.tif (blue)	8	924	154
siW5-baf-10_R3D_594_523_435.tif (blue)	21	6671	317.667
siW5-baf-9_R3D_594_523_435.tif (blue)	14	3375	241.071
siW5-baf-8_R3D_594_523_435.tif (blue)	10	2438	243.8

## Sheet: Fig4-figure supplement 1C
siNT		siFBXW5
UT	EBSS	UT	EBSS
146.379	318.414	472.969	274.065
71.4706	427.964	234.4	297.892
202.115	415.5	432.556	259.296
156.667	252.273	228.72	209.571
118.417	382.355	391.158	351.292
101.085	291.206	283.625	161.76
96.3636	265.52	250.304	162.143
66.4688	237.333	121.417	285.071
125.622	230.588	203.179	275.05
78.814	301.667	260.783	228.562
