# Supplementary material for: The ULK1-FBXW5-SEC23B nexus controls autophagy
Source: eLife. 2018 Dec 31;7:e42253. doi: 10.7554/eLife.42253 (PMC6351106; doi:10.7554/eLife.42253)
Supplement: Figure 4—source data 1. [file elife-42253-fig4-data1.xlsx]

## Sheet: Fig4A
	siNT		siFBXW5
	UT	BafA1	UT	BafA1
	102.514	352.213	303.367	594.5
	86.2162	330.487	430.394	535
	60.7188	240.474	333.125	520.552
	68.725	331.145	190.316	668
	116.149	267.486	422.393	551.04
	65.5385	345.633	310.741	470.5
	191.517	342.116	548.083	697.793
	43.0278	352.125	327.045	648
	74.125	346.963	347.481	425.553
	53.7632	375.333	195.079	518.917

## Sheet: Fig4C
		siNT		siFBXW5		siFBXW5/siSEC23B
		AP	AL	AP	AL	AP	AL
		27.2727	42.3636	27.5	203.75	67.511	97.2727
		27.7143	39.4286	65	270.857	85.3635	130
		27.5	39.3333	62.321	223.333	72.321	117.727
		21.6667	39.1111	69.375	182.5	69.375	109.583
		27.625	41.25	53.3333	218.5.5	55.102	93.8889
		22.7273	39.5455	62.8571	195	62.256	113.714
		27.2225	54.5	63.8889	252.222	69.8889	135
		26	40	60	215.625	71.203	108.75
		27.1429	39	63	124	83	105.833
		25.9091	39.9091	60.125	221.875	68.125	98.75

## Sheet: Fig4D
	group	puncta_area_per_cell
0	Sec23B	107.67
1	Sec23B	69.2015
2	Sec23B	94.5327
3	Sec23B	136.428
4	Sec23B	47.1029
5	Sec23B	68.302
6	Sec23B(S186D)	168.708
7	Sec23B(S186D)	223.209
8	Sec23B(S186D)	186.432
9	Sec23B(S186D)	174.816
10	Sec23B(S186D)	143.075
11	Sec23B(S186D)	172.778

## Sheet: Fig4G
name	T25(GFP)	T50(dapi)
siNT-ebss-10_R3D_D3D_PRJ_594_523_435-White Top Hat	10936	26
siNT-ebss-1_R3D_D3D_PRJ_594_523_435-White Top Hat	11044	36
siNT-ebss-2_R3D_D3D_PRJ_594_523_435-White Top Hat	13799	29
siNT-ebss-3_R3D_D3D_PRJ_594_523_435-White Top Hat	12526	22
siNT-ebss-4_R3D_D3D_PRJ_594_523_435-White Top Hat	14078	20
siNT-ebss-5_R3D_D3D_PRJ_594_523_435-White Top Hat	8724	52
siNT-ebss-6_R3D_D3D_PRJ_594_523_435-White Top Hat	8707	19
siNT-ebss-7_R3D_D3D_PRJ_594_523_435-White Top Hat	12225	19
siNT-ebss-8_R3D_D3D_PRJ_594_523_435-White Top Hat	9589	23
siNT-ebss-9_R3D_D3D_PRJ_594_523_435-White Top Hat	11008	27
siNT-ut-10_R3D_D3D_PRJ_594_523_435-White Top Hat	3149	41
siNT-ut-1_R3D_D3D_PRJ_594_523_435-White Top Hat	3689	17
siNT-ut-2_R3D_D3D_PRJ_594_523_435-White Top Hat	3409	17
siNT-ut-3_R3D_D3D_PRJ_594_523_435-White Top Hat	4821	24
siNT-ut-4_R3D_D3D_PRJ_594_523_435-White Top Hat	3971	61
siNT-ut-5_R3D_D3D_PRJ_594_523_435-White Top Hat	5420	56
siNT-ut-6_R3D_D3D_PRJ_594_523_435-White Top Hat	4795	66
siNT-ut-7_R3D_D3D_PRJ_594_523_435-White Top Hat	3618	59
siNT-ut-8_R3D_D3D_PRJ_594_523_435-White Top Hat	4883	34
siNT-ut-9_R3D_D3D_PRJ_594_523_435-White Top Hat	2610	25
si23A-ebss-10_R3D_D3D_PRJ_594_523_435-White Top Hat	15867	34
si23A-ebss-1_R3D_D3D_PRJ_594_523_435-White Top Hat	10006	17
si23A-ebss-2_R3D_D3D_PRJ_594_523_435-White Top Hat	11599	18
si23A-ebss-3_R3D_D3D_PRJ_594_523_435-White Top Hat	10690	22
si23A-ebss-4_R3D_D3D_PRJ_594_523_435-White Top Hat	12145	23
si23A-ebss-5_R3D_D3D_PRJ_594_523_435-White Top Hat	12382	22
si23A-ebss-6_R3D_D3D_PRJ_594_523_435-White Top Hat	14164	24
si23A-ebss-7_R3D_D3D_PRJ_594_523_435-White Top Hat	8534	26
si23A-ebss-8_R3D_D3D_PRJ_594_523_435-White Top Hat	9383	18
si23A-ebss-9_R3D_D3D_PRJ_594_523_435-White Top Hat	11515	26
si23A-ut-10_R3D_D3D_PRJ_594_523_435-White Top Hat	2712	19
si23A-ut-1_R3D_D3D_PRJ_594_523_435-White Top Hat	4800	28
si23A-ut-2_R3D_D3D_PRJ_594_523_435-White Top Hat	4989	13
si23A-ut-3_R3D_D3D_PRJ_594_523_435-White Top Hat	2861	33
si23A-ut-4_R3D_D3D_PRJ_594_523_435-White Top Hat	3116	23
si23A-ut-5_R3D_D3D_PRJ_594_523_435-White Top Hat	4965	22
si23A-ut-6_R3D_D3D_PRJ_594_523_435-White Top Hat	3999	31
si23A-ut-7_R3D_D3D_PRJ_594_523_435-White Top Hat	5718	23
si23A-ut-8_R3D_D3D_PRJ_594_523_435-White Top Hat	5185	31
si23A-ut-9_R3D_D3D_PRJ_594_523_435-White Top Hat	4927	22
si23B-ebss-10_R3D_D3D_PRJ_594_523_435-White Top Hat	4673	22
si23B-ebss-1_R3D_D3D_PRJ_594_523_435-White Top Hat	6777	34
si23B-ebss-2_R3D_D3D_PRJ_594_523_435-White Top Hat	3488	20
si23B-ebss-3_R3D_D3D_PRJ_594_523_435-White Top Hat	3459	21
si23B-ebss-4_R3D_D3D_PRJ_594_523_435-White Top Hat	4636	15
si23B-ebss-5_R3D_D3D_PRJ_594_523_435-White Top Hat	1863	30
si23B-ebss-6_R3D_D3D_PRJ_594_523_435-White Top Hat	2459	12
si23B-ebss-7_R3D_D3D_PRJ_594_523_435-White Top Hat	6399	20
si23B-ebss-8_R3D_D3D_PRJ_594_523_435-White Top Hat	5074	14
si23B-ebss-9_R3D_D3D_PRJ_594_523_435-White Top Hat	3540	20
si23B-ut-10_R3D_D3D_PRJ_594_523_435-White Top Hat	2198	20
si23B-ut-1_R3D_D3D_PRJ_594_523_435-White Top Hat	3059	38
si23B-ut-2_R3D_D3D_PRJ_594_523_435-White Top Hat	1855	17
si23B-ut-3_R3D_D3D_PRJ_594_523_435-White Top Hat	794	51
si23B-ut-4_R3D_D3D_PRJ_594_523_435-White Top Hat	1707	50
si23B-ut-5_R3D_D3D_PRJ_594_523_435-White Top Hat	1427	17
si23B-ut-6_R3D_D3D_PRJ_594_523_435-White Top Hat	1450	22
si23B-ut-7_R3D_D3D_PRJ_594_523_435-White Top Hat	1926	45
si23B-ut-8_R3D_D3D_PRJ_594_523_435-White Top Hat	2277	26
si23B-ut-9_R3D_D3D_PRJ_594_523_435-White Top Hat	1676	23
