# Supplementary material for: The ULK1-FBXW5-SEC23B nexus controls autophagy
Source: eLife. 2018 Dec 31;7:e42253. doi: 10.7554/eLife.42253 (PMC6351106; doi:10.7554/eLife.42253)
Supplement: Figure 5—source data 1. [file elife-42253-fig5-data1.xlsx]

## Sheet: Fig5A
SEC23B		SEC23B(S186A)		SEC23B(S186D)
UT	EBSS	UT	EBSS	UT	EBSS
0.41	0.72	0.297	0.25	0.676	0.734
0.435	0.687	0.345	0.264	0.597	0.675
0.356	0.686	0.375	0.348	0.595	0.751
0.385	0.68	0.179	0.21	0.632	0.721
0.368	0.657	0.392	0.408	0.604	0.603
0.392	0.616	0.406	0.412	0.557	0.566
0.477	0.629	0.05	0.445	0.587	0.658
0.434	0.638	0.266	0.37	0.649	0.686
0.462	0.626	0.38	0.434	0.595	0.601
0.453	0.65	0.235	0.292	0.626	0.705
0.225	0.654	0.3	0.229	0.585	0.438
0.341	0.633	0.5	0.271	0.599	0.634
0.382	0.63	0.237	0.18	0.552	0.58
0.244	0.623	0.2	0.159	0.697	0.645
0.257	0.686	0.2	0.41	0.651	0.677
0.371	0.68	0.048	0.372	0.605	0.685
0.349	0.71	0.051	0.281	0.608	0.7
0.434	0.616	0.266	0.387	0.587	0.63
0.462	0.629	0.38	0.387	0.649	0.648
0.34	0.638	0.235	0.134	0.595	0.566
0.322	0.626	0.3	0.271	0.626	0.658
0.341	0.65	0.5	0.22	0.585	0.686
0.382	0.654	0.237	0.391	0.599	0.601
0.412	0.623	0.2	0.425	0.552	0.711
0.311			0.331	0.678	0.438
0.371			0.277	0.651	0.68
0.349			0.239	0.604
			0.135

## Sheet: Fig5B
siNT		siULK1
UT	EBSS	UT	EBSS
0.31	0.62	0.34	0.36
0.31	0.687	0.345	0.37
0.356	0.686	0.375	0.348
0.385	0.55	0.33	0.31
0.368	0.657	0.392	0.408
0.392	0.616	0.406	0.412
0.377	0.629	0.28	0.445
0.434	0.638	0.266	0.37
0.28	0.626	0.38	0.434
0.353	0.65	0.235	0.39
0.225	0.56	0.3	0.38
0.341	0.633	0.5	0.371
0.382	0.616	0.237	0.48
0.244	0.629	0.33	0.359
0.257	0.638	0.2	0.41
0.371	0.626	0.258	0.372
0.349	0.65	0.266	0.481
0.341	0.654	0.38	0.387
0.382	0.53	0.235	0.387
0.244	0.55	0.3	0.33
0.257	0.657	0.5	0.54
0.371	0.621	0.266	0.32
0.26	0.629	0.38	0.391
0.349	0.638	0.235	0.425
0.341	0.633	0.3	0.331
0.382	0.65	0.5	0.377
0.33	0.56	0.237	0.439
0.257	0.631	0.2	0.36
0.371		0.31
0.27		0.25

## Sheet: Fig5C
a.u	EV	SEC23B	SEC23B(S186A)	SEC23B(S186D)	ULK1	ULK1KD	FBXW5	FBXW5(DF)
1	44.2	41.6	44.95	18.5	28.5	44.5	27.6	44.15
2	40.75	32.5	36.15	17.45	27.44	44	26	42.25
3	38.6	37.75	41	15.4	28.45	43.45	25.4	40.35

## Sheet: Fig5D
	a.u	UT	EBSS
	1	59.7	26.1
	2	56.75	31.5
	3	53.6	19.5

## Sheet: Fig5F
ut	WT	73.7863
ut	WT	82.8546
ut	WT	105.707
ut	WT	110.139
ut	WT	50.2987
ut	WT	52.0185
ut	WT	47.2435
ut	WT	82.0135
ut	WT	95.5702
ut	WT	30.7682
ebss	WT	154.215
ebss	WT	130.597
ebss	WT	208.768
ebss	WT	146.935
ebss	WT	150.793
ebss	WT	132.033
ebss	WT	154.78
ebss	WT	129.29
ebss	WT	243.68
ebss	WT	157.364
ut	S186A	55.4053
ut	S186A	49.6777
ut	S186A	163.489
ut	S186A	75.6762
ut	S186A	45.6777
ut	S186A	107.478
ut	S186A	59.054
ut	S186A	75.0385
ut	S186A	61.973
ut	S186A	53.3124
ebss	S186A	130.879
ebss	S186A	98.4775
ebss	S186A	77.4552
ebss	S186A	79.0701
ebss	S186A	69.4188
ebss	S186A	110.872
ebss	S186A	113.037
ebss	S186A	93.5513
ebss	S186A	80.9104
ebss	S186A	89.2468
