# Supplementary material for: The ULK1-FBXW5-SEC23B nexus controls autophagy
Source: eLife. 2018 Dec 31;7:e42253. doi: 10.7554/eLife.42253 (PMC6351106; doi:10.7554/eLife.42253)
Supplement: Figure 6—source data 1. [file elife-42253-fig6-data1.xlsx]

## Sheet: Fig6E
siNT		siFBXW5		siFBXW5/siSEC24AB		siFBXW5/siSEC24CD
AP	AL	AP	AL	AP	AL	AP	AL
2.8	88.4	56.2	473.2	8.75	47	60.7778	379
43.7778	215	34.8571	114.143	107.333	7	25.2222	49.7778
26.4545	47.8182	75.375	153.875	16.5833	4.33333	45.5	160.917
20.25	129.625	14.6667	320.167	18.3333	0	19.8	197.4
78.1818	0	103.444	60	8.8	51.6	21.6667	144
6.07692	11.0769	36.8	132.2	28.7778	78.4444	30	29.4444
18.6667	218.167	60.375	33.25	103.5	0	102.5	0
4.90909	67.0909	28.3	43	21.875	163.125	17.2857	128.286
12.7	111.7	52.625	177.75	49.2	148.9	30.4286	96.2857
9	91.9	65.8333	117.833	12.7143	71.2857	36.4167	193.583
20.5	148.167	14.5714	266.429	20.8333	101.5	103.333	0
5.53846	61.2308	57.4	363	6.22222	90.2222	30.4286	208.286
18.5	194.25	26.3333	191	47.7143	208.143	34	57.7
28.875	112.125	24.2222	118.333	31.6667	189.333	42.5833	94.0833
4.2	32.3	243.667	157.667	91.375	0	167	1294
22.5385	160.615	71.5	21.5	36	87	30.1429	86.8571
14.5385	92.4615	19.8	623.8	10.6667	75.3333	41.7143	181.286
8.88889	106.444	52.75	120.625	76.5714	0	20.4	45.4
11.875	64	14.4	255.4	32.8333	179.333	18.5333	126.8
12.5714	85.1429	59.5	147.25	288.5	0	134.1	172.8

## Sheet: Fig6F
Parental A375				SEC23B(S186A)-A375
SEC24B		SEC24C		SEC24B		SEC24C
UT	EBSS	UT	EBSS	UT	EBSS	UT	EBSS
Pearson's Coefficient:	Pearson's Coefficient:	Pearson's Coefficient:	Pearson's Coefficient:	Pearson's Coefficient:	Pearson's Coefficient:	Pearson's Coefficient:	Pearson's Coefficient:
0.319	0.645	0.449	0.374	0.319	0.356	0.339	0.411
0.486	0.502	0.356	0.35	0.356	0.422	0.456	0.335
0.25	0.597	0.415	0.125	0.361	0.363	0.428	0.221
0.323	0.56	0.345	0.343	0.347	0.412	0.327	0.354
0.343	0.755	0.235	0.4	0.378	0.421	0.415	0.478
0.352	0.721	0.421	0.43	0.344	0.453	0.328	0.482
0.444	0.62	0.422	0.355	0.325	0.356	0.336	0.463
0.375	0.511	0.45	0.072	0.391	0.364	0.418	0.479
0.237	0.632	0.354	0.178	0.41	0.412	0.301	0.358
0.33	0.683	0.411	0.325	0.391	0.369	0.422	0.419
0.306	0.686	0.361	0.395	0.325	0.468	0.385	0.402
0.41	0.66	0.401	0.33	0.423	0.336	0.436	0.431
0.21	0.595	0.343	0.287	0.325	0.347	0.258	0.332
0.355	0.626	0.315	0.325	0.314	0.368	0.279	0.412
0.457	0.78	0.417	0.225	0.361	0.462	0.446	0.365
0.49	0.648	0.343	0.309	0.395	0.367	0.369	0.332
0.342	0.635	0.334	0.187	0.362	0.314	0.434	0.456
0.399	0.718	0.319	0.295	0.383	0.566	0.426	0.436
0.283	0.758	0.383	0.228	0.324	0.358	0.486	0.365
0.497	0.445	0.397	0.633	0.441	0.367	0.47	0.325
0.517	0.423	0.436	0.662	0.239	0.363	0.43	0.442
0.326	0.43	0.45	0.63	0.356	0.441	0.488	0.369
0.311	0.722	0.391	0.297	0.334	0.422	0.258	0.478
0.41	0.66	0.341	0.513	0.369	0.412	0.369	0.632
0.386	0.416	0.322	0.475	0.335	0.313	0.354	0.532
0.365	0.575	0.378	0.403	0.301	0.446	0.552	0.369
0.392	0.637	0.394	0.377	0.378	0.557	0.366	0.412
0.443	0.687	0.343		0.41	0.456	0.377	0.412
0.21	0.654	0.44		0.33	0.414	0.471	0.358
0.34	0.687	0.54		0.367	0.489	0.466	0.368
0.344		0.332		0.341	0.425	0.335	0.452
0.369		0.318		0.305	0.428	0.314	0.441
0.384		0.484		0.384	0.362	0.345	0.563
0.304		0.354		0.314	0.447	0.255	0.347
				0.366	0.432	0.324	0.333
				0.486	0.412	0.421	0.314
				0.25	0.565	0.422	0.456
				0.341	0.469	0.369	0.663
				0.387	0.514	0.336	0.544
				0.306	0.417	0.378	0.521
					0.458	0.414	0.366
					0.43	0.368	0.347
					0.566	0.335	0.321
					0.578	0.334	0.412
						0.469	0.632
						0.412	0.441
							0.447
							0.423
							0.443
							0.412
							0.423
							0.552
							0.233
							0.417
							0.311
							0.336
							0.325
							0.445
							0.486
							0.365
