# Supplementary material for: The ULK1-FBXW5-SEC23B nexus controls autophagy
Source: eLife. 2018 Dec 31;7:e42253. doi: 10.7554/eLife.42253 (PMC6351106; doi:10.7554/eLife.42253)
Supplement: Figure 7—source data 1. [file elife-42253-fig7-data1.xlsx]

## Sheet: Fig7C
treatment	puncta_area_per_nuclei_count	image_name
ut	50.3225	WT-ut-10_R3D_594_xx_435
ut	47.8124	WT-ut-1_R3D_594_xx_435
ut	60.8132	WT-ut-2_R3D_594_xx_435
ut	30.031	WT-ut-3_R3D_594_xx_435
ut	43.6794	WT-ut-4_R3D_594_xx_435
ut	24.883	WT-ut-5_R3D_594_xx_435
ut	48.6253	WT-ut-6_R3D_594_xx_435
ut	40.5281	WT-ut-7_R3D_594_xx_435
ut	35.3803	WT-ut-8_R3D_594_xx_435
ut	63.4143	WT-ut-9_R3D_594_xx_435
BafA1	138.58	WT-BafA1-10_R3D_594_xx_435
BafA1	170.145	WT-BafA1-1_R3D_594_xx_435
BafA1	169.134	WT-BafA1-2_R3D_594_xx_435
BafA1	129.366	WT-BafA1-3_R3D_594_xx_435
BafA1	162.509	WT-BafA1-4_R3D_594_xx_435
BafA1	171.664	WT-BafA1-5_R3D_594_xx_435
BafA1	184.928	WT-BafA1-6_R3D_594_xx_435
BafA1	164.812	WT-BafA1-7_R3D_594_xx_435
BafA1	125.625	WT-BafA1-8_R3D_594_xx_435
BafA1	116.206	WT-BafA1-9_R3D_594_xx_435
ut	100.591	S186N-ut-10_R3D_594_xx_435
ut	68.333	S186N-ut-1_R3D_594_xx_435
ut	61.1895	S186N-ut-2_R3D_594_xx_435
ut	58.5243	S186N-ut-3_R3D_594_xx_435
ut	73.6612	S186N-ut-4_R3D_594_xx_435
ut	73.8633	S186N-ut-5_R3D_594_xx_435
ut	72.5042	S186N-ut-6_R3D_594_xx_435
ut	63.8734	S186N-ut-7_R3D_594_xx_435
ut	77.7304	S186N-ut-8_R3D_594_xx_435
ut	84.041	S186N-ut-9_R3D_594_xx_435
BafA1	246.895	S186N-BafA1-10_R3D_594_xx_435
BafA1	265.247	S186N-BafA1-1_R3D_594_xx_435
BafA1	284.737	S186N-BafA1-2_R3D_594_xx_435
BafA1	302.985	S186N-BafA1-3_R3D_594_xx_435
BafA1	460.825	S186N-BafA1-4_R3D_594_xx_435
BafA1	231.618	S186N-BafA1-5_R3D_594_xx_435
BafA1	304.073	S186N-BafA1-6_R3D_594_xx_435
BafA1	248.056	S186N-BafA1-7_R3D_594_xx_435
BafA1	263.351	S186N-BafA1-8_R3D_594_xx_435
BafA1	276.149	S186N-BafA1-9_R3D_594_xx_435
		Group
		Mean
		SD
		SEM
		N
